# Supplementary material
Source: Springer Nature journal article supplement (https://www.springermedizin.de/resource/supplementary/12885_2012_3925_MOESM1_ESM.pdf/9464766)
Supplement: MOESM1 [file 9464766]

### Screening period (-72 h to Day 0)

- Assess for study eligibility
- Perform screening laboratory assessment
- Obtain informed consent

### Randomisation 1:1 (Day 1)

Stratified for the following factors:

- Tumour (known distant metastasis, no distant metastasis, haematological malignancy)
- Geographical region (four separate regions)
- Known history of previously diagnosed VTE (yes or no)

**Tinzaparin 175 IU/kg once daily  
(N=450)**

**Warfarin once daily (target INR 2.0–3.0)  
overlapping with initial tinzaparin 175  
IU/kg once daily (5–10 days) (N=450)**

### Treatment period (Day 1 to Day 180)

- Scheduled visits on Days 1, 7, 14, 30, 60, 90, 120, 150 and 180
- From Day 30, patients will be contacted by telephone 14 days after each monthly visit
- From Day 30, patients withdrawn from study treatment will be followed up by telephone in place of scheduled monthly visits

### Follow-up period (Day 181 to Day 210)
